# Supplementary material for: Dynamic Distribution of the Gut Microbiota and the Relationship with Apparent Crude Fiber Digestibility and Growth Stages in Pigs
Source: PubMed Central journal article supplement (PMC4404679; doi:10.1038/srep09938), 2015-04-21
Supplement: srep09938-s1.pdf [file srep09938-s1.pdf]

1        **Dynamic Distribution of the Gut Microbiota and the Relationship**  
2        **with Apparent Crude Fiber Digestibility and Growth Stages in Pigs**

3        Qing Niu <sup>1,2+</sup>, Pinghua Li <sup>1,2+</sup>, Shuaishuai Hao <sup>1,2</sup>, Yejiu Zhang <sup>1,2</sup>, Sung Woo Kim <sup>3</sup>, Huizhi Li <sup>1,2</sup>,  
4        Xiang Ma <sup>1,2</sup>, Shuo Gao <sup>1,2</sup>, Lichun He <sup>1,2</sup>, WangJun Wu <sup>1,2</sup>, Xuegen Huang <sup>4</sup>, Jindi Hua <sup>4</sup>, Bo Zhou  
5        <sup>1,2\*</sup> & Ruihua Huang <sup>1,2\*</sup>

6        <sup>1</sup> Institute of Swine Science, Nanjing Agricultural University, Nanjing, 210095, China, <sup>2</sup> Huaian  
7        Academy of Nanjing Agricultural University, Huaian, 223005, China, <sup>3</sup> Department of Animal  
8        Science, North Carolina State University, Raleigh, North Carolina, 27695, United States of  
9        America, <sup>4</sup> Sutai Pig Breeding Center, Suzhou, 215000, China

10

11

12        \* Corresponding author: Ruihua Huang and Bo Zhou. Institute of Swine Science, Nanjing  
13        Agricultural University, Nanjing 210095, China. Tel: +86-25-84395362; +86-13814540789; Fax:  
14        +86-25-84395314; E-mail: Ruihua Huang, hrh2002@163.com.

15        + These authors contributed equally to this work.

16

17

## Supporting Information

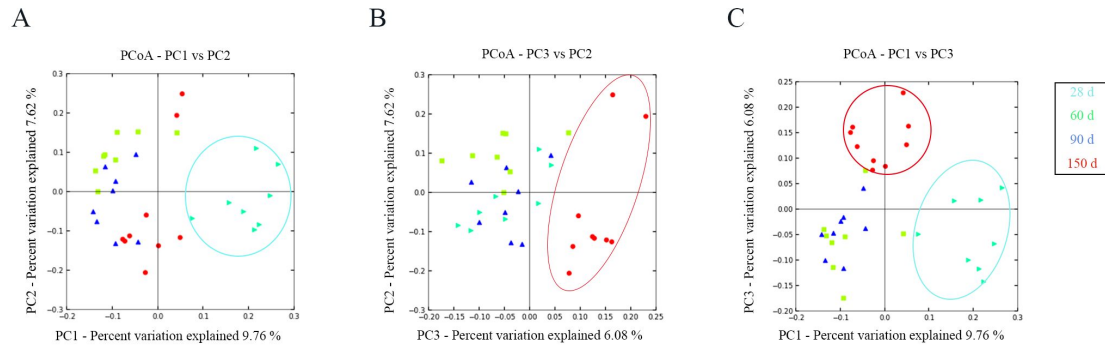

18

19 **Fig. S1A-C PCoA plots.** PCoA of unweighted UniFrac distances for the fecal microbiota at

20 different ages. In the unweighted UniFrac analysis of the fecal samples, the first principal

21 coordinate, explained 9.76% of sample variation, separated groups ( 28 day of age ) from others.

22 The third principal coordinate ( 6.08% of sample variation ) separated groups ( 150 day of age )

23 from others.

24

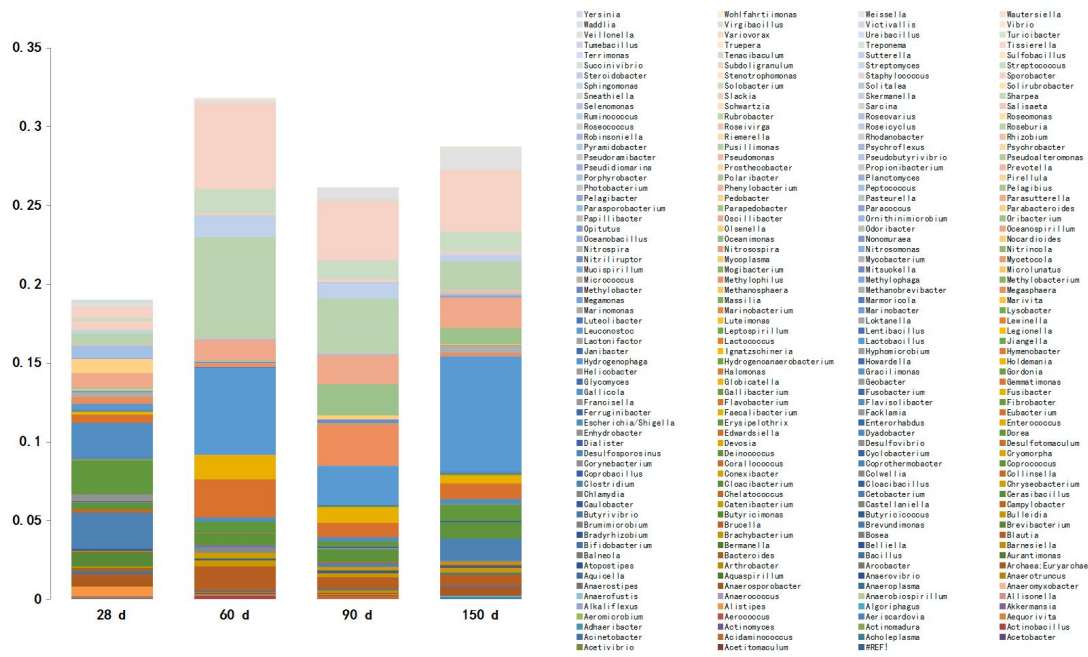

25

26 **Fig. S2 Relative abundances of distinct genera in four groups.** Distribution of the genera as a

27 percentage of the total number of identified 16S rDNA sequences in individual groups.

28

29 **Table S1 Raw reads, sequences and OTUs from four groups.**

| <b>Group</b> | <b>Raw reads</b> | <b>High quality sequences</b> | <b>OTUs</b> |
|--------------|------------------|-------------------------------|-------------|
| 28 d         | 1,532,635        | 1,003,915                     | 14,306      |
| 60 d         | 1,532,635        | 822,609                       | 15,051      |
| 90 d         | 1,364,816        | 964,057                       | 16,329      |
| 150 d        | 1,307,708        | 1,138,078                     | 17,593      |

31 **Table S2 Pearson's correlations between age and 5 distinct phyla in four growing phases. \***

32 The correlation is significant at a level of 0.05; \*\* the correlation is significant at a level of 0.01.

| phyla                | Age                   |          |
|----------------------|-----------------------|----------|
|                      | Pearson's correlation | <i>p</i> |
| <i>TM7</i>           | 0.664 **              | 0.000    |
| <i>Tenericutes</i>   | 0.658**               | 0.000    |
| <i>Synergistetes</i> | - 0.495**             | 0.003    |
| <i>Lentisphaerae</i> | - 0.420*              | 0.015    |
| <i>Fusobacteria</i>  | - 0.327               | 0.064    |

33

34 **Table S3 The relative abundances of 36 distinct genus in four groups were significantly**  
 35 **different, and Pearson's correlations with age.** <sup>a,b,\*</sup> The correlation is significant at a level of  
 36 0.05; <sup>A,B,\*\*</sup> the correlation is significant at a level of 0.01.

| Genera                   | Age                        |                          |                           |                           | Pearson's correlation |
|--------------------------|----------------------------|--------------------------|---------------------------|---------------------------|-----------------------|
|                          | 28 d                       | 60 d                     | 90 d                      | 150 d                     |                       |
| <i>Actinomyces</i>       | 14.63±4.06 <sup>A</sup>    | 0.25±0.16 <sup>B</sup>   | 0.63±0.38 <sup>B</sup>    | 2.11±1.29 <sup>B</sup>    | -0.433*               |
| <i>Aeromicrobium</i>     | 0.88±0.52 <sup>B</sup>     | 0.13±0.13 <sup>B</sup>   | 0.00±0.00 <sup>B</sup>    | 2.78±1.18 <sup>A</sup>    | 0.373*                |
| <i>Akkermansia</i>       | 70.00±33.99 <sup>A</sup>   | 1.50±0.63 <sup>B</sup>   | 1.38±0.32 <sup>B</sup>    | 2.00±0.67 <sup>B</sup>    | -0.379*               |
| <i>Anaeroplasma</i>      | 2.75±0.41 <sup>B</sup>     | 7.75±4.91 <sup>B</sup>   | 7.38±3.42 <sup>B</sup>    | 35.56±6.91 <sup>A</sup>   | 0.669**               |
| <i>Anaerosporobacter</i> | 10.00±2.77 <sup>b</sup>    | 17.25±3.98 <sup>b</sup>  | 21.88±6.77                | 55.00±20.65 <sup>a</sup>  | 0.464**               |
| <i>Atopostipes</i>       | 0.75±0.25                  | 0.00±0.00 <sup>b</sup>   | 0.63±0.18                 | 2.22±1.15 <sup>a</sup>    | 0.346*                |
| <i>Aurantimonas</i>      | 1.00±0.73                  | 0.25±0.16 <sup>b</sup>   | 0.63±0.38 <sup>b</sup>    | 9.78±5.69 <sup>a</sup>    | 0.375*                |
| <i>Brevundimonas</i>     | 19.63±12.17                | 10.50±3.96 <sup>b</sup>  | 5.50±2.00 <sup>b</sup>    | 115.56±61.08 <sup>a</sup> | 0.373*                |
| <i>Butyricicoccus</i>    | 39.88±5.90 <sup>b</sup>    | 103.50±21.53             | 155.63±43.39 <sup>b</sup> | 154.89±42.47 <sup>b</sup> | 0.403*                |
| <i>Caulobacter</i>       | 0.38±0.26 <sup>b</sup>     | 0.25±0.25 <sup>b</sup>   | 0.50±0.38 <sup>b</sup>    | 2.67±1.22 <sup>a</sup>    | 0.420*                |
| <i>Cloacibacillus</i>    | 167.13±66.72 <sup>A</sup>  | 2.25±0.37 <sup>B</sup>   | 1.38±0.38 <sup>B</sup>    | 2.56±0.50 <sup>B</sup>    | -0.436*               |
| <i>Collinsella</i>       | 264.13±106.97 <sup>a</sup> | 63.00±13.79 <sup>b</sup> | 117.75±67.03              | 37.11±11.60 <sup>b</sup>  | -0.362*               |
| <i>Deinococcus</i>       | 0.75±0.41                  | 0.50±0.27 <sup>b</sup>   | 0.13±0.13 <sup>b</sup>    | 2.78±1.27 <sup>a</sup>    | 0.360*                |
| <i>Desulfovibrio</i>     | 533.63±176.21 <sup>A</sup> | 10.38±2.88 <sup>B</sup>  | 72.25±44.84 <sup>B</sup>  | 23.00±4.77 <sup>B</sup>   | -0.464*               |
| <i>Gallibacterium</i>    | 0.63±0.50 <sup>b</sup>     | 0.25±0.16 <sup>b</sup>   | 0.00±0.00 <sup>b</sup>    | 3.00±1.36 <sup>a</sup>    | 0.391*                |
| <i>Globicatella</i>      | 1.25±0.41 <sup>A</sup>     | 0.00±0.00 <sup>B</sup>   | 0.13±0.13 <sup>B</sup>    | 0.11±0.11 <sup>B</sup>    | -0.419*               |
| <i>Gordonia</i>          | 6.25±5.54                  | 1.00±0.27 <sup>b</sup>   | 0.38±0.18 <sup>b</sup>    | 37.89±20.41 <sup>b</sup>  | 0.370*                |

|                          |                           |                         |                              |                                |          |
|--------------------------|---------------------------|-------------------------|------------------------------|--------------------------------|----------|
| <i>Hyphomicrobium</i>    | 0.50±0.19                 | 0.50±0.38               | 0.38±0.26 <sup>b</sup>       | 2.00±0.87 <sup>a</sup>         | 0.368*   |
| <i>Lactobacillus</i>     | 471.88±64.38 <sup>b</sup> | 5,698.25±1,962.60       | 2,965.25±1,482.88            | 9,190.78±4,344.15 <sup>a</sup> | 0.360*   |
| <i>Lactonifactor</i>     | 6.50±2.02 <sup>A</sup>    | 0.50±0.27 <sup>B</sup>  | 0.38±0.18 <sup>B</sup>       | 0.56±0.29 <sup>B</sup>         | -0.472** |
| <i>Marmoricola</i>       | 0.38±0.26 <sup>b</sup>    | 0.38±0.26 <sup>b</sup>  | 0.25±0.16 <sup>b</sup>       | 5.44±2.86 <sup>a</sup>         | 0.411*   |
| <i>Methanosphaera</i>    | 0.00±0.00 <sup>b</sup>    | 0.00±0.00 <sup>b</sup>  | 0.38±0.26                    | 2.89±1.71 <sup>a</sup>         | 0.404*   |
| <i>Nitrosospira</i>      | 0.50±0.38                 | 0.13±0.13 <sup>B</sup>  | 0.25±0.25 <sup>b</sup>       | 1.22±0.28 <sup>Aa</sup>        | 0.378*   |
| <i>Nocardioides</i>      | 15.50±10.99               | 2.88±0.79 <sup>b</sup>  | 1.50±0.53 <sup>b</sup>       | 57.89±27.84 <sup>a</sup>       | 0.360*   |
| <i>Oribacterium</i>      | 66.38±8.19 <sup>B</sup>   | 62.75±5.81 <sup>B</sup> | 2,426.13±647.27 <sup>b</sup> | 1,219.67±491.62 <sup>Aa</sup>  | 0.358*   |
| <i>Paracoccus</i>        | 22.75±17.33 <sup>b</sup>  | 5.88±2.44 <sup>b</sup>  | 4.25±1.10 <sup>b</sup>       | 151.44±68.04 <sup>a</sup>      | 0.431*   |
| <i>Phenylobacterium</i>  | 0.63±0.38                 | 1.25±0.73               | 1.00±0.50                    | 4.22±2.30                      | 0.345*   |
| <i>Pseudobutyrvibrio</i> | 5.13±1.06 <sup>B</sup>    | 15.00±4.72 <sup>B</sup> | 5.25±1.37 <sup>B</sup>       | 56.33±12.46 <sup>A</sup>       | 0.646**  |
| <i>Pseudomonas</i>       | 38.00±14.63 <sup>B</sup>  | 18.00±4.03 <sup>B</sup> | 15.63±2.92 <sup>B</sup>      | 204.78±84.47 <sup>A</sup>      | 0.449**  |
| <i>Robinsoniella</i>     | 0.25±0.25 <sup>B</sup>    | 0.38±0.18 <sup>B</sup>  | 0.38±0.18 <sup>B</sup>       | 5.44±2.15 <sup>A</sup>         | 0.515**  |
| <i>Roseomonas</i>        | 1.00±0.63 <sup>b</sup>    | 0.13±0.13 <sup>b</sup>  | 0.13±0.13 <sup>b</sup>       | 6.00±2.92 <sup>a</sup>         | 0.404*   |
| <i>Sharpea</i>           | 109.63±51.54 <sup>a</sup> | 11.13±3.80 <sup>b</sup> | 31.13±19.67                  | 11.22±3.49 <sup>b</sup>        | -0.345*  |
| <i>Solobacterium</i>     | 1.13±0.40 <sup>A</sup>    | 0.00±0.00 <sup>B</sup>  | 0.13±0.13 <sup>B</sup>       | 0.00±0.00 <sup>B</sup>         | -0.460** |
| <i>Sphingomonas</i>      | 17.75±11.98               | 3.13±0.77 <sup>b</sup>  | 2.88±0.64 <sup>b</sup>       | 132.78±80.09 <sup>a</sup>      | 0.353*   |
| <i>Treponema</i>         | 241.00±63.75              | 1,670.78±923.65         | 202.50±60.40                 | 803.88±194.05                  | 0.385*   |
| <i>Victivallis</i>       | 32.13±13.78 <sup>A</sup>  | 3.63±3.34 <sup>B</sup>  | 2.63±0.73 <sup>B</sup>       | 1.22±0.64 <sup>B</sup>         | -0.420*  |

38 **Table S4 The relative abundances of 12 distinct classes in four groups were significantly**  
39 **different, and Pearson's correlations with age.** <sup>a,b,\*</sup> The correlation is significant at a level of  
40 0.05; <sup>A,B,\*\*</sup> the correlation is significant at a level of 0.01.

| Classes                                     | Age                          |                            |                             |                               | Pearson's correlation |
|---------------------------------------------|------------------------------|----------------------------|-----------------------------|-------------------------------|-----------------------|
|                                             | 28 d                         | 60 d                       | 90 d                        | 150 d                         |                       |
| <i>Bacilli</i>                              | 975.25±148.96 <sup>b</sup>   | 7756.88±1923.42            | 4742.50±1783.75             | 11379.89±4511.41 <sup>a</sup> | 0.396*                |
| <i>Bacteroidia</i>                          | 6413.13±1970.41 <sup>A</sup> | 629.25±100.20 <sup>B</sup> | 1086.50±187.76 <sup>B</sup> | 1354.22±305.74 <sup>B</sup>   | -0.405**              |
| <i>Deltaproteobacteria</i>                  | 589.25±191.77 <sup>A</sup>   | 16.88±5.60 <sup>B</sup>    | 75.25±45.62 <sup>B</sup>    | 36.33±6.55 <sup>B</sup>       | -0.460**              |
| <i>Elusimicrobia</i>                        | 0.13±0.13 <sup>b</sup>       | 0.13±0.13 <sup>b</sup>     | 1.13±0.61                   | 1.56±0.65 <sup>a</sup>        | 0.419*                |
| <i>Erysipelotrichia</i>                     | 3669.75±1003.60 <sup>b</sup> | 5951.00±1396.07            | 5578.13±801.34              | 8650.56±1912.63 <sup>a</sup>  | 0.414*                |
| <i>Lentisphaeria</i>                        | 36.75±15.10 <sup>A</sup>     | 3.63±3.34 <sup>B</sup>     | 2.88±0.74 <sup>B</sup>      | 1.44±0.78 <sup>B</sup>        | -0.429*               |
| <i>Mollicutes</i>                           | 4.25±1.05 <sup>B</sup>       | 10.63±4.94 <sup>B</sup>    | 8.50±3.06 <sup>B</sup>      | 37.00±6.41 <sup>A</sup>       | 0.678**               |
| <i>Spirochaetes</i>                         | 186.38±50.53                 | 168.88±59.23               | 670.38±149.73               | 1373.11±850.23                | 0.353*                |
| <i>Subdivision5</i>                         | 5.25±1.05                    | 2.25±0.45                  | 3.13±0.77                   | 18.89±6.18 <sup>A</sup>       | 0.489**               |
| <i>Synergistia</i>                          | 200.75±63.04 <sup>A</sup>    | 2.75±0.41 <sup>B</sup>     | 1.75±0.45 <sup>B</sup>      | 3.11±0.54 <sup>B</sup>        | -0.496**              |
| <i>TM7_genera_incerta</i><br><i>e_sedis</i> | 15.38±5.11 <sup>B</sup>      | 3.75±0.77 <sup>B</sup>     | 41.13±10.95 <sup>B</sup>    | 320.44±84.44 <sup>A</sup>     | 0.663**               |
| <i>Verrucomicrobiae</i>                     | 78.75±32.83 <sup>A</sup>     | 4.75±1.01 <sup>B</sup>     | 4.00±0.98 <sup>B</sup>      | 7.67±2.03 <sup>B</sup>        | -0.392*               |



42 **Table S5 The relative abundances of 17 distinct orders in four groups were significantly**  
43 **different, and Pearson's correlations with age.** <sup>a,b,\*</sup> The correlation is significant at a level of  
44 0.05; <sup>A,B,\*\*</sup> the correlation is significant at a level of 0.01.

| Orders                                    | Age                           |                            |                             |                               | Pearson's correlation |
|-------------------------------------------|-------------------------------|----------------------------|-----------------------------|-------------------------------|-----------------------|
|                                           | 28 d                          | 60 d                       | 90- d                       | 150 d                         |                       |
| <i>Alphaproteobacteria_incertae_sedis</i> | 0.13± 0.13 <sup>B</sup>       | 0.50±0.50                  | 0.13±0.13                   | 1.33±0.58 <sup>A</sup>        | 0.353*                |
| <i>Anaeroplasmatales</i>                  | 2.88± 0.77 <sup>B</sup>       | 7.88±4.90                  | 7.00±3.35 <sup>B</sup>      | 35.22±6.88 <sup>A</sup>       | 0.664**               |
| <i>Bacteroidales</i>                      | 6413.13± 1970.41 <sup>A</sup> | 629.25±100.20 <sup>B</sup> | 1086.50±187.76 <sup>B</sup> | 1354.22±305.74 <sup>B</sup>   | -0.405*               |
| <i>Caulobacterales</i>                    | 21.13± 12.42 <sup>b</sup>     | 13.13±4.61 <sup>b</sup>    | 7.38±2.87 <sup>b</sup>      | 123.67±62.71 <sup>a</sup>     | 0.384*                |
| <i>Desulfovibrionales</i>                 | 581.88± 191.20 <sup>A</sup>   | 10.50±2.89 <sup>B</sup>    | 72.88±45.20 <sup>B</sup>    | 25.78±5.02 <sup>B</sup>       | -0.465**              |
| <i>Elusimicrobiales</i>                   | 0.13± 0.13 <sup>b</sup>       | 0.13±0.13 <sup>b</sup>     | 1.13±0.61                   | 1.56±0.65 <sup>a</sup>        | 0.419*                |
| <i>Erysipelotrichales</i>                 | 3669.75± 1003.60 <sup>b</sup> | 5951.00±1396.07            | 5578.13±801.34              | 8650.56±1912.63 <sup>a</sup>  | 0.414*                |
| <i>Lactobacillales</i>                    | 882.13±143.88 <sup>b</sup>    | 7673.25±1920.99            | 4694.75±1776.72             | 11273.56±4500.22 <sup>a</sup> | 0.397*                |
| <i>Pseudomonadales</i>                    | 83.38±38.08 <sup>A</sup>      | 39.75±13.06 <sup>B</sup>   | 28.00±5.22 <sup>B</sup>     | 382.44±120.60 <sup>B</sup>    | 0.509**               |
| <i>Rhodobacterales</i>                    | 46.38±29.15 <sup>b</sup>      | 24.00±11.98 <sup>b</sup>   | 11.50±3.59 <sup>B</sup>     | 208.00±87.55 <sup>Aa</sup>    | 0.412*                |
| <i>Sphingomonadales</i>                   | 23.00±15.80                   | 5.75±2.24 <sup>b</sup>     | 4.50±0.98 <sup>b</sup>      | 164.56±95.28 <sup>a</sup>     | 0.362*                |
| <i>Spirochaetales</i>                     | 186.38±50.53                  | 168.88±59.23               | 670.38±149.73               | 1373.11±850.23                | 0.353*                |
| <i>Subdivision5_genera_incertae_sedis</i> | 5.25±1.05 <sup>B</sup>        | 2.25±0.45 <sup>B</sup>     | 3.13±0.77 <sup>B</sup>      | 18.89±6.18 <sup>A</sup>       | 0.489**               |
| <i>Synergistales</i>                      | 200.75±63.04 <sup>A</sup>     | 2.75±0.41 <sup>B</sup>     | 1.75±0.45 <sup>B</sup>      | 3.11±0.54 <sup>B</sup>        | -0.496**              |
| <i>TM7_genera_incertae_sedis</i>          | 15.38±5.11 <sup>B</sup>       | 3.75±0.77 <sup>B</sup>     | 41.13±10.95 <sup>B</sup>    | 320.44±84.44 <sup>A</sup>     | 0.663**               |
| <i>Verrucomicrobiales</i>                 | 78.75±32.83 <sup>A</sup>      | 4.75±1.01 <sup>B</sup>     | 4.00±0.98 <sup>B</sup>      | 7.67±2.03 <sup>B</sup>        | -0.392*               |
| <i>Victivallales</i>                      | 36.75±15.10 <sup>A</sup>      | 3.63±3.34 <sup>B</sup>     | 2.88±0.74 <sup>B</sup>      | 1.44±0.78 <sup>B</sup>        | -0.429*               |

46 **Table S6 The relative abundances of 8 distinct families in four groups were significantly**  
 47 **different, and Pearson's correlations with age.** <sup>a,b,\*</sup> The correlation is significant at a level of  
 48 0.05; <sup>A,B,\*\*</sup> the correlation is significant at a level of 0.01.

| Families                                  | Age                        |                            |                            |                              | Pearson's correlation |
|-------------------------------------------|----------------------------|----------------------------|----------------------------|------------------------------|-----------------------|
|                                           | 28 d                       | 60 d                       | 90 d                       | 150 d                        |                       |
| <i>Anaeroplasmataceae</i>                 | 39.13±6.42 <sup>A</sup>    | 7.75±4.91 <sup>B</sup>     | 3.38±0.75 <sup>B</sup>     | 6.33±3.03 <sup>B</sup>       | -0.544**              |
| <i>Deinococcaceae</i>                     | 2.38±1.36 <sup>a</sup>     | 1.25±0.73                  | 0.75±0.41                  | 0.11±0.11 <sup>b</sup>       | -0.355*               |
| <i>Eubacteriaceae</i>                     | 169.00±36.70 <sup>A</sup>  | 59.00±18.60 <sup>B</sup>   | 30.13±7.64 <sup>B</sup>    | 48.89±10.28 <sup>B</sup>     | -0.481**              |
| <i>Intrasporangiaceae</i>                 | 105.25±48.76 <sup>a</sup>  | 16.13±12.43 <sup>b</sup>   | 38.75±34.62                | 2.44±0.88 <sup>b</sup>       | -0.350*               |
| <i>Subdivision5_genera_incertae_sedis</i> | 21.00±6.59 <sup>A</sup>    | 2.25±0.45 <sup>B</sup>     | 4.75±1.11 <sup>B</sup>     | 3.44±0.75 <sup>B</sup>       | -0.433*               |
| <i>Succinivibrionaceae</i>                | 80.63±39.08 <sup>b</sup>   | 76.25±24.17 <sup>b</sup>   | 30.88±12.85 <sup>B</sup>   | 196.89±50.86 <sup>Aa</sup>   | 0.385*                |
| <i>TM7_genera_incertae_sedis</i>          | 358.75±85.33 <sup>A</sup>  | 5.13±1.48 <sup>B</sup>     | 15.25±5.15 <sup>B</sup>    | 37.00±10.50 <sup>B</sup>     | -0.500**              |
| <i>Veillonellaceae</i>                    | 753.75±342.63 <sup>B</sup> | 720.13±127.37 <sup>B</sup> | 413.25±144.94 <sup>B</sup> | 4308.11±1655.80 <sup>A</sup> | 0.465**               |

50 **Table S7A,B Ingredient composition ( g/kg ) of the experimental diets.**

51 **A**

| <b>28 d</b>   |      |
|---------------|------|
| crude protein | ≥205 |
| Calcium       | 7-12 |
| moisture      | ≤130 |
| crude fiber   | ≤40  |
| TP            | ≥6   |
| lysine        | ≥14  |
| crude ash     | ≤7   |
| salt          | 3-8  |

52 **B**

|               | <b>60 d</b>                                | <b>90 d</b>                                 | <b>150 d</b>                                |
|---------------|--------------------------------------------|---------------------------------------------|---------------------------------------------|
| Corn          | 690                                        | 670                                         | 660                                         |
| Soybean meal  | 200                                        | 200                                         | 160                                         |
| Wheat Bran    | 20                                         | 9                                           | 140                                         |
| Fish meal     | 20                                         | 0                                           | 0                                           |
| Barley        | 30                                         | 0                                           | 0                                           |
| De-mold agent | 1                                          | 0                                           | 0                                           |
| Vitamin A     | 2.4×10 <sup>-3</sup> -4.2×10 <sup>-3</sup> | 1.2×10 <sup>-3</sup> -1.92×10 <sup>-3</sup> | 1.2×10 <sup>-3</sup> -1.92×10 <sup>-3</sup> |
| Vitamin D3    | 5×10 <sup>-5</sup> -9×10 <sup>-5</sup>     | 5×10 <sup>-5</sup> -9×10 <sup>-5</sup>      | 5×10 <sup>-5</sup> -9×10 <sup>-5</sup>      |

|                       |                                            |                                             |                                            |
|-----------------------|--------------------------------------------|---------------------------------------------|--------------------------------------------|
| Vitamin E             | $\geq 5 \times 10^{-3}$                    | $\geq 0.45 \times 10^{-3}$                  | $\geq 0.45 \times 10^{-3}$                 |
| Vitamin K3            | $4.5 \times 10^{-5} - 8.5 \times 10^{-5}$  | $4.5 \times 10^{-5} - 8.5 \times 10^{-5}$   | $3.5 \times 10^{-5} - 6.5 \times 10^{-5}$  |
| Vitamin B1            | $\geq 5 \times 10^{-5}$                    | $\geq 4.5 \times 10^{-5}$                   | $\geq 4.5 \times 10^{-5}$                  |
| Vitamin B2            | $\geq 1.3 \times 10^{-5}$                  | $\geq 1.1 \times 10^{-5}$                   | $\geq 1.1 \times 10^{-5}$                  |
| Vitamin B6            | $\geq 7.5 \times 10^{-5}$                  | $\geq 6.5 \times 10^{-5}$                   | $\geq 6.5 \times 10^{-5}$                  |
| Vitamin B12           | $\geq 5 \times 10^{-7}$                    | $\geq 4 \times 10^{-7}$                     | $\geq 4 \times 10^{-7}$                    |
| Niacin                | $\geq 7.5 \times 10^{-4}$                  | $\geq 0.65 \times 10^{-4}$                  | $\geq 0.65 \times 10^{-4}$                 |
| Calcium Pantothenate  | $\geq 3 \times 10^{-4}$                    | $\geq 0.28 \times 10^{-4}$                  | $\geq 0.28 \times 10^{-4}$                 |
| Folat                 | $\geq 2.5 \times 10^{-5}$                  | $\geq 2.3 \times 10^{-5}$                   | $\geq 2.3 \times 10^{-5}$                  |
| bBiotin               | $\geq 2.5 \times 10^{-5}$                  | $\geq 2.3 \times 10^{-5}$                   | $\geq 2.3 \times 10^{-5}$                  |
| Choline Chloride      | $\geq 7 \times 10^{-3}$                    | $\geq 7 \times 10^{-3}$                     | $\geq 6.5 \times 10^{-3}$                  |
| copper                | $3 \times 10^{-3} - 4.5 \times 10^{-3}$    | $2.75 \times 10^{-3} - 3.75 \times 10^{-3}$ | $5 \times 10^{-4} - 8.75 \times 10^{-4}$   |
| Iron                  | $3 \times 10^{-3} - 4 \times 10^{-3}$      | $3 \times 10^{-3} - 5 \times 10^{-3}$       | $3 \times 10^{-3} - 5 \times 10^{-3}$      |
| Manganese             | $1.2 \times 10^{-3} - 2 \times 10^{-3}$    | $1.2 \times 10^{-3} - 2 \times 10^{-3}$     | $1.2 \times 10^{-3} - 2 \times 10^{-3}$    |
| Zinc                  | $2.5 \times 10^{-3} - 3.75 \times 10^{-3}$ | $2.5 \times 10^{-3} - 3.75 \times 10^{-3}$  | $2.5 \times 10^{-3} - 3.75 \times 10^{-3}$ |
| Iodine                | $1.7 \times 10^{-5} - 3.3 \times 10^{-5}$  | $1.7 \times 10^{-5} - 3.3 \times 10^{-5}$   | $1.7 \times 10^{-5} - 3.3 \times 10^{-5}$  |
| Selenium              | $7 \times 10^{-6} - 1.2 \times 10^{-6}$    | $7 \times 10^{-6} - 1.2 \times 10^{-6}$     | $7 \times 10^{-6} - 1.2 \times 10^{-6}$    |
| Calcium               | 4.8-6.4                                    | 4.4-6                                       | 4-5.6                                      |
| Total Phosphorus (TP) | $\geq 0.1$                                 | $\geq 0.1$                                  | $\geq 0.56$                                |
| Salt                  | 2.8-4.4%                                   | 2.8-4.4%                                    | 2.8-4.4%                                   |
| Moisture              | $\leq 4$                                   | $\leq 4$                                    | $\leq 4$                                   |
